# Supplementary material for: Generation of a Pure Culture of Neuron-like Cells with a Glutamatergic Phenotype from Mouse Astrocytes
Source: Biomedicines. 2022 Apr 18;10(4):928. doi: 10.3390/biomedicines10040928 (PMC9031297; doi:10.3390/biomedicines10040928)
Supplement: Supplementary file 1 [file biomedicines-10-00928-s001.zip › biomedicines-1666034-supplementary.pdf]

## **Supplementary Information**

### **Generation of a pure culture of neuron-like cells with a glutamatergic phenotype from mouse astrocytes**

Gary Stanley Fernandes<sup>1</sup>, Rishabh Singh Deo<sup>1</sup>, and Kyeong Kyu Kim<sup>1, \*</sup>

<sup>1</sup> Department of Precision Medicine, Graduate School of Basic Medical Science (GSBMS), Institute for Anti-microbial Resistance Research and Therapeutics, Sungkyunkwan University School of Medicine, Suwon, 16419, Korea

\* Correspondence: kyeongkyu@skku.edu (K.K.K.); Tel.: +82-31-299-6152

\*To whom all correspondence should be addressed:

Tel: 82-31-299-6136

Fax: 82-31-299-6159

E-mail: [kyeongkyu@skku.edu](mailto:kyeongkyu@skku.edu)

## **Contents:**

### **Supplementary Figures**

**Figure S1.**

**Figure S2**

**Figure S3**

**Figure S4**

**Figure S5**

### **Supplementary Tables**

**Table S1: List of primers used in RT-qPCR analysis.**

**Table S2: List of antibodies used in this study.**

**Table S3: List of conversions of ectodermal lineage cells into neurons using chemical cocktail.**

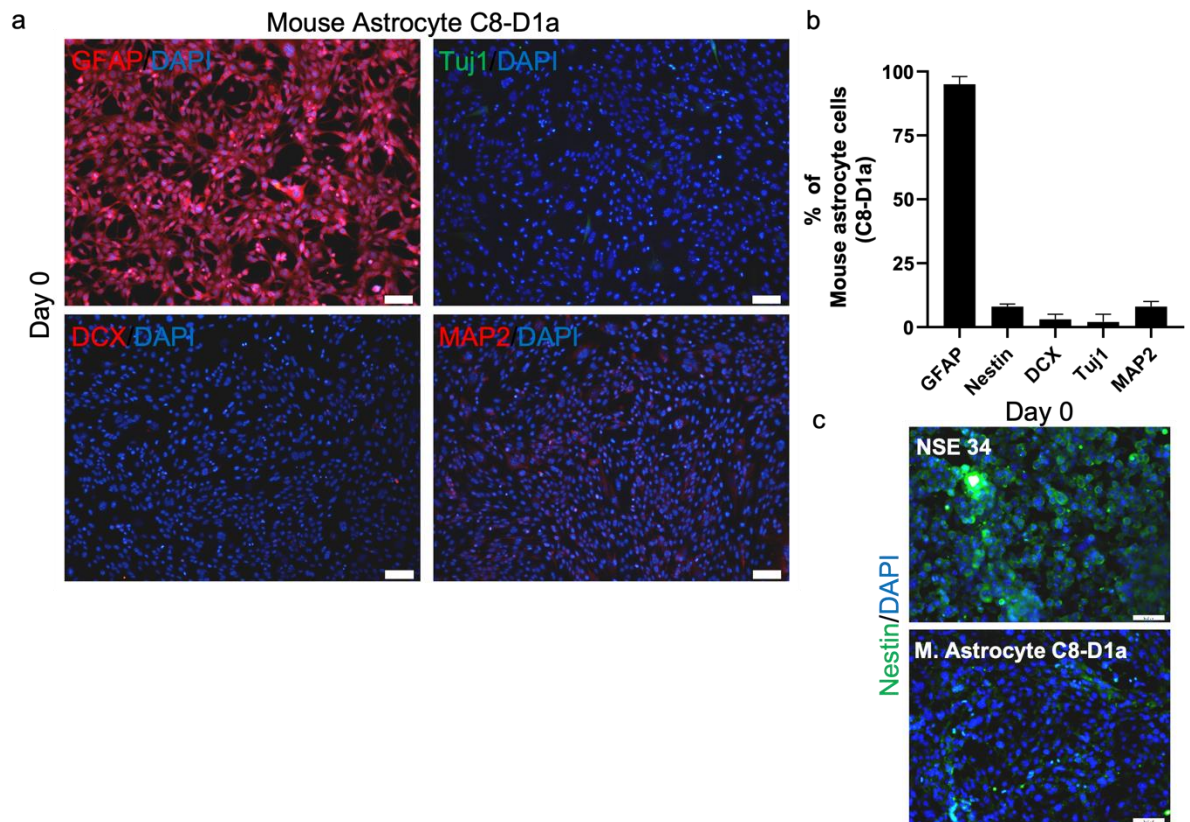

**Figure S1.** a) Immunofluorescence labeling of mouse astrocytes C8-D1a. Scale bar, 50  $\mu$ m. b) Percentage of cells positive for the astrocytic marker GFAP, the stem cell marker nestin, and the neuronal markers DCX, Tuj1, and MAP2. c) Immunofluorescence labeling with the stem cell marker nestin and NSC-34 as a positive control on mouse astrocytes C8-D1a. Scale bar, 20  $\mu$ m.

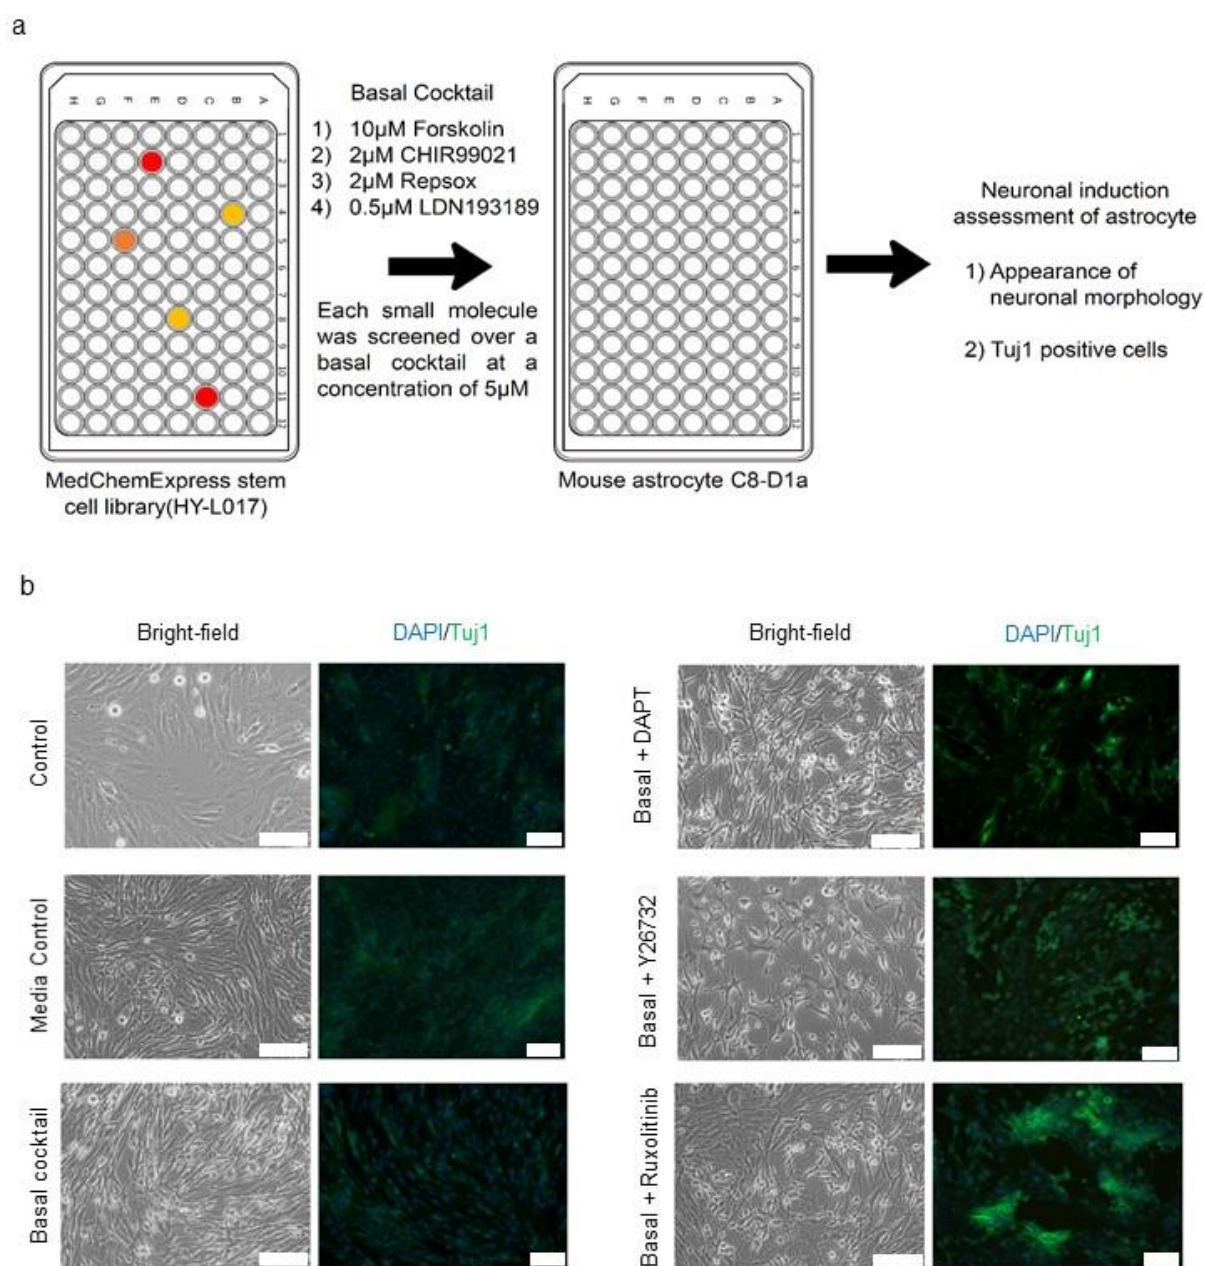

**Figure S2.** a) Schematic design for screening small molecules from the MedChemExpress library (HY-L017). b) Comparison of bright-field images and Tuj1<sup>+</sup> immunostaining images from positive hits in the presence of the basal cocktail, medium control, and control. Scale bar, 100 µm for bright-field, 50 µm for immunostaining images.

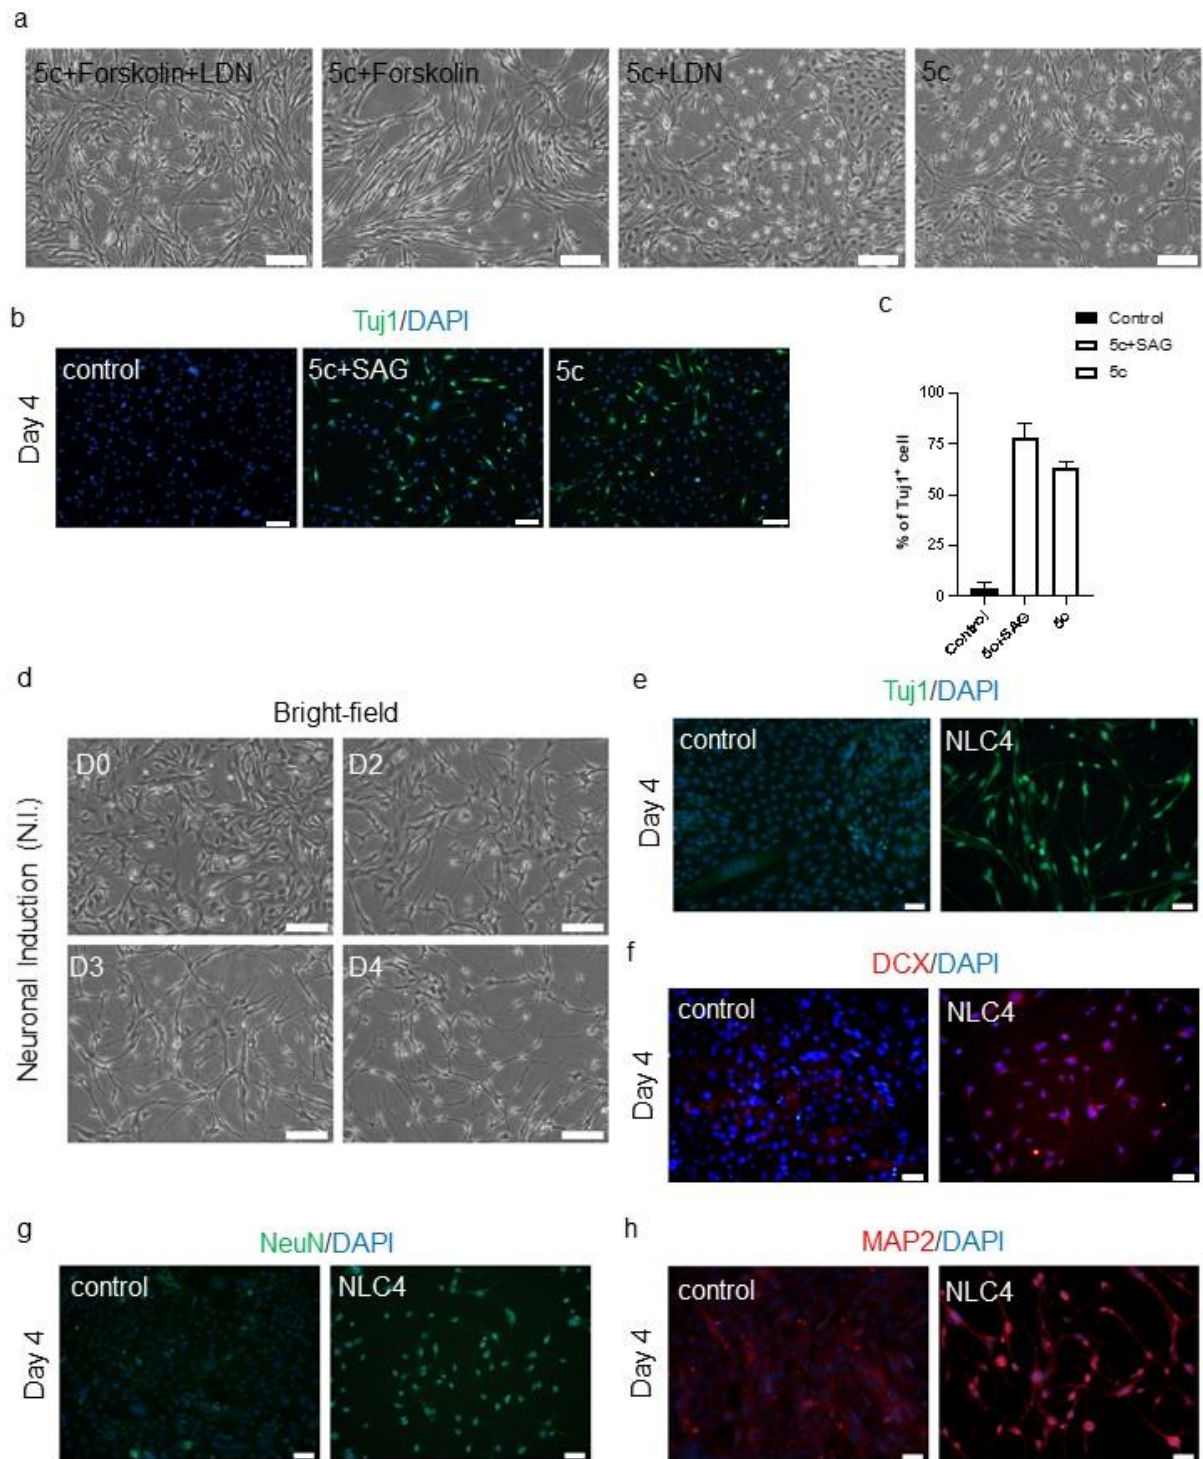

**Figure S3.** a) Immunostaining of four-day-old neuronally induced astrocytes to investigate the addition of SAG to the 5C cocktail. Scale bar, 100  $\mu$ m. b) Tuj1<sup>+</sup> cell count of the 5C and 5C+SAG cocktails. c) Quantification of Tuj1<sup>+</sup> cells in the presence and absence of SAG. d) Representative bright-field image of mouse

astrocytes C8-D1a during four days of exposure to our neuronal induction cocktail. Scale bar, 100  $\mu\text{m}$ . e) Immunostaining with the neuronal marker Tuj1 in four-day-old neuronally induced mouse astrocytes C8-D1a. Scale bar, 50  $\mu\text{m}$ . f) Immunostaining with the neuronal marker DCX in four-day-old neuronally induced mouse astrocytes C8-D1a. Scale bar, 50  $\mu\text{m}$ . g) Immunostaining with the neuronal marker NeuN in four-day-old neuronally induced mouse astrocytes C8-D1a. Scale bar, 50  $\mu\text{m}$ . h) Immunostaining with the neuronal marker MAP2 in four-day-old neuronally induced mouse astrocytes C8-D1a cell-line. Scale bar, 50  $\mu\text{m}$ .

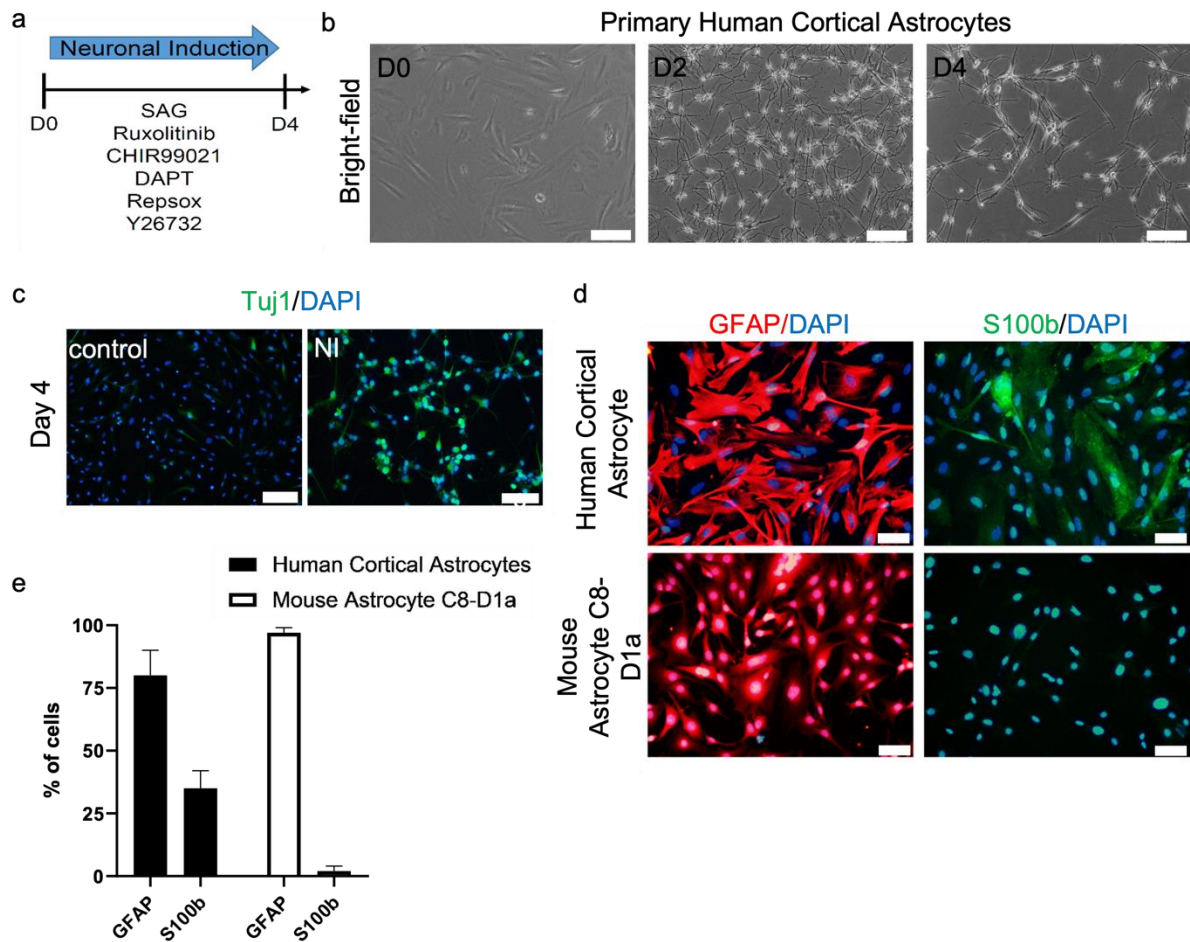

**Figure S4.** a) Schematic design of the protocol for converting human cortical astrocytes into neurons. b) Representative bright-field image of human cortical astrocytes during four days of exposure to our neuronal induction cocktail. Scale bar, 100  $\mu$ m. c) Immunostaining of neuronal induced (NI) primary human cortical astrocytes with neuronal marker Tuj1 upon treated with NIM for four days. Scale bar, 50  $\mu$ m. d) Immunofluorescence labeling with GFAP and S100b in mouse astrocytes C8-D1a and human cortical astrocytes. Scale bar, 50  $\mu$ m. e) Percentage of cells positive for the astrocytic markers GFAP and S100b.

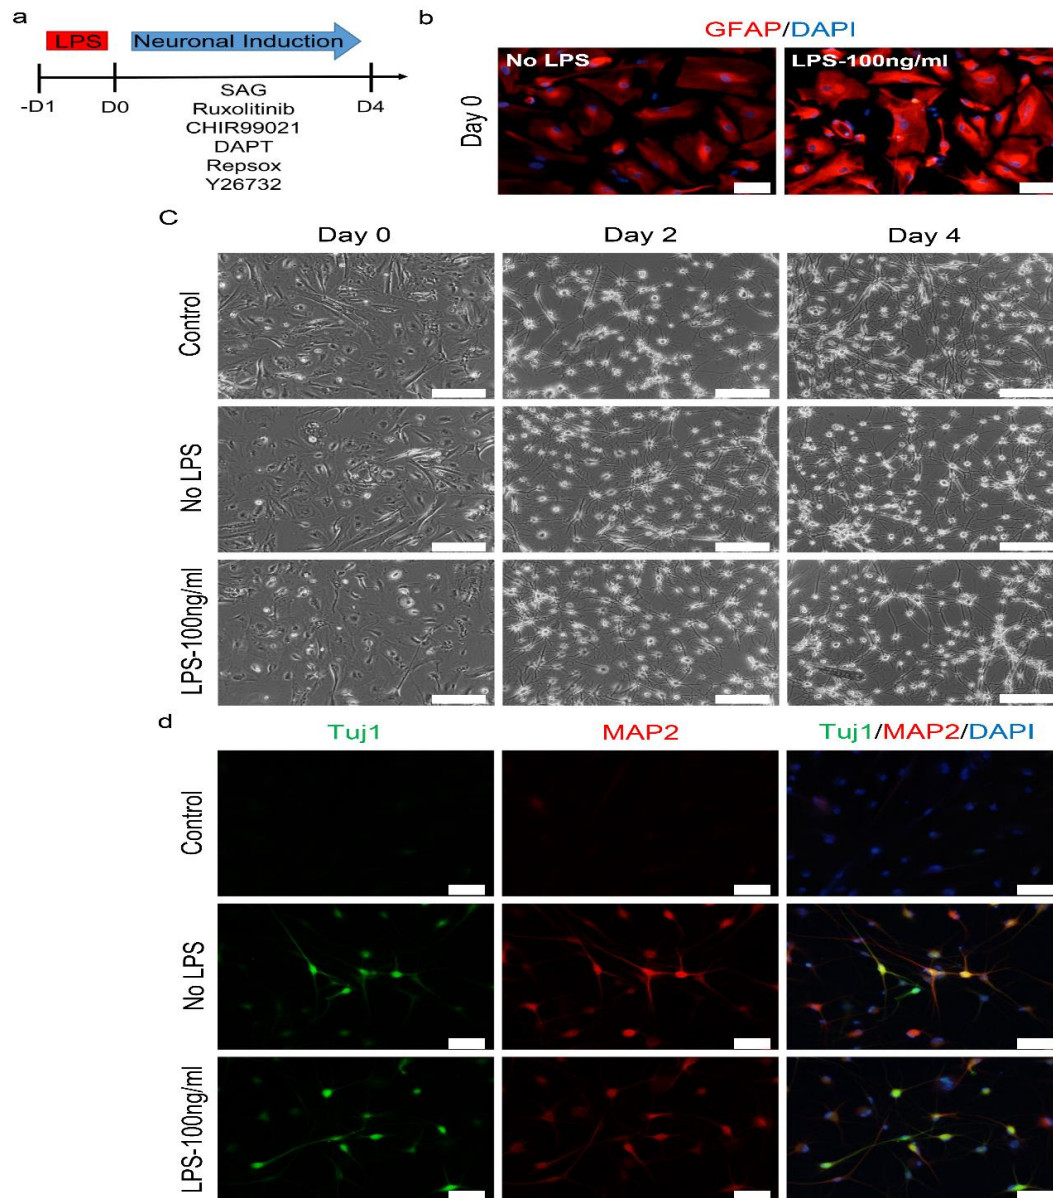

**Figure S5** a) Schematic design for assessing neuronal reprogramming potential of our chemical cocktail on LPS-induced human cortical reactive astrocytes. b) Immunostaining of chemically induced astrocytes with astrocyte marker GFAP pretreated with or without LPS. Scale bar, 50  $\mu$ m. c) Representative bright-field images of chemically induced astrocytes over four days of exposure to our neuronal induction cocktail pretreated with or without LPS. Scale bar, 100  $\mu$ m. d) Immunofluorescence labeling chemically induced astrocytes with Tuj1 and MAP2 after four days of exposure in neuronal induction cocktail pretreated with or without LPS. Scale bar, 50  $\mu$ m.

## Supplementary Tables

**Table S1: List of primers used in RT-qPCR analysis.**

| Gene Name | Position | Sequence               |
|-----------|----------|------------------------|
| NeuroD1   | 5' Prime | ACGCAGAAGGCAAGGTGTCC   |
|           | 3' Prime | G TTCCTCGTCCTGAGAACTG  |
| Ngn2      | 5' Prime | TGGCTGGCATCTGCTCTATT   |
|           | 3' Prime | TAGGCATTGTGACGAATCTG   |
| Ascl1     | 5' Prime | ACTTGA ACTCTATGGCGGGTT |
|           | 3' Prime | CCAGTTGGTAAAGTCCAGCAG  |
| Tbr1      | 5' Prime | ACAATGGGCAGATGGTGGTT   |
|           | 3' Prime | GTGTCCTCTGTGCCATCCTC   |
| Lmx1a     | 5' Prime | GCAAAGGGGACTATGAGAAGGA |
|           | 3' Prime | CGTTTGGGGCGCTTATGGT    |
| Nurr1     | 5' Prime | ACCACTCTTCGGGAGAATACA  |
|           | 3' Prime | GGCATT TGGTACAAGCAAGGT |
| DCX       | 5' Prime | TTCAGGACCACAAGCAATGA   |
|           | 3' Prime | GGAAACCGGAGTTGTCAAAA   |
| NeuN      | 5' Prime | ACAGACAACCAGCAACTCCA   |
|           | 3' Prime | CCGAATTGCCCGAACAT      |
| MAP2a     | 5'Prime  | AACCAATTCGCAGAGCAGGA   |
|           | 3'Primer | GGGAGTTCCAGGGGTGATTG   |
| Syn1      | 5'Prime  | TCTTCCTCCAACCTCCACTCCT |

|        |           |                         |
|--------|-----------|-------------------------|
|        | 3'Primer  | TGGGCCTTTGCTTGTTTATTTT  |
| vGLUT1 | 5'Prime   | TGTTGGGTTTGGGGATT       |
|        | 3'Primer  | AGGTTTTATGCTTTGCACTTA   |
| GAD67  | 5'Prime   | CACAACTCAGCGGCATAGA     |
|        | 3'Primer  | CTGGAAGAGGTAGCCTGCAC    |
| Th     | 5'Prime   | CACTATGCCCACCCCAG       |
|        | 3'Primer  | CGCCGTCCAATGAACCTT      |
| Achat  | 5' Primer | ACTGGGTGTCTGAGTACTGG    |
|        | 3' Primer | TTGGAAGCCATTTTGACTAT    |
| Gapdh  | 5' Primer | AGGTCGGTGTGAACGGATTG    |
|        | 3' Primer | TGTAGACCATGTAGTTGAGGTCA |

**Table S2: List of antibodies used in this study.**

| <b>Primary antibody</b> | <b>Company (Catalog No.)</b> | <b>Dilution ratio</b> | <b>Species</b> | <b>Secondary antibody</b>                | <b>Company (catalog No.)</b> | <b>Dilution ratio</b> |
|-------------------------|------------------------------|-----------------------|----------------|------------------------------------------|------------------------------|-----------------------|
| Anti-Nestin             | Genetex (GTX630201)          | 1:300                 | Mouse          | Goat Anti-Mouse IgG H&L(Alexa Fluor 488) | Thermofisher (A-11029)       | 1:500                 |
| Anti-GFAP               | Novos Biological (NB300-141) | 1:300                 | Rabbit         | Goat Anti-Mouse IgG H&L(Alexa Fluor 546) | Thermofisher (A-11010)       | 1:500                 |
| Anti-Tuj1               | R&D SYSTEMS (MAB1195)        | 1:300                 | Mouse          | Goat Anti-Mouse IgG H&L(Alexa Fluor 488) | Thermofisher (A-11029)       | 1:500                 |
| Anti-Tuj1               | BioLegend (802001)           | 1:300                 | Rabbit         | Goat Anti-Mouse IgG H&L(Alexa Fluor 546) | Thermofisher (A-11010)       | 1:500                 |
| Anti-NeuN               | Millipore (MAB377)           | 1:100                 | Mouse          | Goat Anti-Mouse IgG H&L(Alexa Fluor 488) | Thermofisher (A-11029)       | 1:500                 |
| Anit-DCX                | Abcam (ab18723)              | 1:300                 | Rabbit         | Goat Anti-Mouse IgG H&L(Alexa Fluor 546) | Thermofisher (A-11010)       | 1:500                 |
| Anti-MAP2               | Millipore (ab5622)           | 1:300                 | Rabbit         | Goat Anti-Mouse IgG H&L(Alexa Fluor 546) | Thermofisher (A-11010)       | 1:500                 |
| Anit-Syn1               | Millipore (ab1543)           | 1:300                 | Rabbit         | Goat Anti-Mouse IgG H&L(Alexa Fluor 546) | Thermofisher (A-11010)       | 1:500                 |
| Anti-vGLUT1             | Millipore (MAB5502)          | 1:300                 | Mouse          | Goat Anti-Mouse IgG H&L(Alexa Fluor 488) | Thermofisher (A-11029)       | 1:500                 |
| Anti-GAD67              | Millipore (MAB5406)          | 1:300                 | Mouse          | Goat Anti-Mouse IgG H&L(Alexa Fluor 488) | Thermofisher (A-11029)       | 1:500                 |
| Anti-TH                 | Millipore                    | 1:300                 | Mouse          | Goat Anti-Mouse IgG                      | Thermofisher (A-11029)       | 1:500                 |

|            |                          |       |       |                                          |                        |       |
|------------|--------------------------|-------|-------|------------------------------------------|------------------------|-------|
|            | (MAB318)                 |       |       | H&L(Alexa Fluor 488)                     |                        |       |
| Anti-S100b | Thermofisher (MA5-12969) | 1:300 | Mouse | Goat Anti-Mouse IgG H&L(Alexa Fluor 488) | Thermofisher (A-11029) | 1:500 |

**Table S3: List of conversions of ectodermal lineage cells into neurons using chemical cocktail.**

| Starting cell type        | Generate cells    | Chemical cocktail used                                       | Reference |
|---------------------------|-------------------|--------------------------------------------------------------|-----------|
| Müller cells              | Neuron-like cells | Forskolin, ISX9, CHIR99021, I-BET151, and Y-27632            | [68]      |
| Apical papilla stem cells | Neuron-like cells | VPA, CHIR99021, RepSox, Forskolin, SP600125, GO6983, Y-27632 | [69]      |
